# Supplementary material for: Turf performance and physiological responses of native Poa species to summer stress in Northeast China
Source: PeerJ journal article supplement (doi:10.7717/peerj.12252), 2021-09-30
Supplement: Raw_data.zip [file Raw data.xlsx]

## Sheet: Sheet1
Figure 1a: Precipitation(mm)
Entries	2017	2018	30 yr avg.
Jan	4.4	6	-17.6
Feb	5.3	4.4	-12.1
Mar	4.2	10.4	-2.4
Apr	2.9	25.9	8
May	51.8	12.1	15.7
Jun	92.2	186.4	21.3
Jul	50.2	172.1	23.5
Aug	215.2	121.9	21.9
Sep	37	76.7	15.6
Oct	5.2	15.1	6.8
Nov	7.1	15.8	-4.6
Dec	5.3	4.4	-14.4
Figure 1b: Temperature(°C)
Entries	2017	2018	30 yr avg.
Jan	-16.6	-19.5	-17.6
Feb	-11	-16.2	-12.1
Mar	-1.7	-3.7	-2.4
Apr	9.1	9	8
May	16.7	16.6	15.7
Jun	19.9	21.2	21.3
Jul	24.7	24.9	23.5
Aug	22.1	21.4	21.9
Sep	15	15.3	15.6
Oct	6.2	7.7	6.8
Nov	-5.7	-2.8	-4.6
Dec	-17.1	-13.1	-14.4
Table 1 The monthly turf quality and color responses of three native Poa species and three introduced cultivars of Kentucky bluegrass during the 2017 and 2018 growing seasons in Harbin, China.
Entries	Two years average turfgrass quality (1-9)																			Two years average turf color (1-9)
	May			Jun			Jul			Aug			Sept			Oct				May			Jun			Jul			Aug			Sept			Oct
Hpp	7.4	7.4	7.7	7.2	7.1	7.3	6.7	6.8	6.9	6.2	6.6	6.7	6.9	7	7.1	7.6	7.7	7.9		8.2	8.9	8.4	7.9	8.2	7.9	7.1	7.7	7.7	7.2	6.5	6.7	7.2	7.6	7.7	7.9	8.3	8.4
Hpsi	6.7	6	6.5	6.4	5.8	5.8	5.1	5.6	5.5	5.3	4.8	4.9	5.2	5.5	5.8	6.5	6	6.1		6.2	6.4	6.9	6.1	6.2	6.3	5.2	5.4	5.9	5.3	5.8	5.4	6.2	6.7	6.9	6.3	7.3	6.8
Hpsp	7.3	8.4	7.7	3.8	4.4	3.8	0.7	1.1	1.2	0.9	1.3	0.8	4.2	4.6	4.7	6.7	6.9	7.4		8.8	8.4	8.3	4.7	5.4	4.9	0.9	1.1	1	0.7	0.9	1.4	8.4	8.7	9.3	8.2	8.4	9.2
Mid-night	7.7	7.9	8.4	7.4	7.9	8.1	7.4	7.5	7.6	6.9	6.9	7.2	7.6	7.8	8	7.8	7.9	8.2		8	8.6	8.9	7.9	8.1	8.6	7.8	7.9	8.3	6.7	7.2	7.1	7.6	8.2	7.9	8.1	8.2	9.2
Moon-light	6.9	7	7.7	6.9	7.1	6.9	6.3	6.6	6.6	6.5	5.8	5.7	7	7.3	7.3	7.2	7.4	7.9		7.5	8.2	8.3	7.5	7.9	8	7.9	7.4	7.2	6	6.5	6.7	7.2	7.3	7.7	7.6	8.1	7.7
Blue-Chip	6.4	6.9	7.1	6.7	6.4	6.4	6.2	6	5.8	4.9	5.2	5.5	5.9	5.8	6.3	6.9	6.8	7.3		7.6	7.9	8.5	7.6	6.9	7.1	7.2	6.7	7.1	5.6	5.7	6.1	6.9	7.2	6.9	7.7	7.6	7.2
Table 2 The monthly turf coverage and growth rate responses of three native Poa species and three introduced cultivars of Kentucky bluegrass during the 2017 and 2018 growing seasons in Harbin, China.
Entries	Two years average turfgrass coverage (%)																			Two years average turfgrass growth rate (mm/per day)
	May			Jun			Jul			Aug			Sept			Oct				May			Jun			Jul			Aug			Sept			Oct
Hpp	92.3	93.5	97.4	93.2	95.3	100.7	92.2	93	97.1	87.2	86.6	85.4	92.2	89.6	89.7	90.1	92.5	97		10.8	11.9	11.5	11.6	13.9	12.9	9.8	11.2	10.2	7.9	8.8	9.1	10.9	9.8	9.9	10.2	11.5	10.7
Hpsi	85.1	85.8	85.6	89.6	87.6	88.3	80.6	81.9	82.3	82.7	83.6	83.3	85.5	84.8	85.3	85.3	84.2	84.6		16.9	18.4	18.1	17.4	18.9	19.5	17.4	15.8	16.4	11.3	13.3	12.9	13.2	14.6	13.6	15.2	14.1	14.5
Hpsp	78.3	79.4	84.3	28.9	29.4	33.5	5.2	5.2	6.1	2.8	3.7	3.1	75.6	80.1	77.1	87.5	85.9	92.1		4.6	4.4	5.4	3.3	3.2	3.7	/	/	/	/	/	/	2.4	2.5	2.9	4.3	4.4	5.1
Mid-night	94.7	95.9	99.8	97.8	96.5	101.2	93.5	95.8	99.3	88.1	90.6	91.9	93.2	96.4	97.8	92.4	94.8	99.3		17.5	16.2	18.2	17.3	20.5	18.9	16.8	15.7	16.4	11.9	12.9	13.3	15.1	14.6	14.7	14.1	15.7	16.1
Moon-light	92.8	93.1	94.6	93.8	94.3	94.5	92.2	91.1	91.8	84.9	87.7	86.9	88.5	89.6	90.4	92.8	94.5	93.5		10.5	11.9	11.2	12.3	11.9	13.3	9.4	9.9	9.5	7.9	8.3	8.1	9.7	11.5	10.9	10.6	11.9	11.1
Blue-Chip	91.1	89.4	90.4	91.6	89.9	90.9	87.5	89.6	88.1	83.5	85.1	84.3	87.1	89.4	88.1	89.9	91.1	90.2		10.6	9.1	10	9.9	10.6	11.3	7.8	8.2	9.2	8.2	7.4	7.8	8.6	9.6	9.1	9.1	9.3	10.4
Table 3 The tiller number responses of three native Poa species and three introduced cultivars of Kentucky bluegrass during 2017 and 2018 growing seasons in Harbin, China.
Entries	Two year average turfgrass tillers (tillers/cm2)
	May			Jun			Jul			Aug			Sept			Oct
Hpp	11.3	10.3	10.8	11.5	11.7	12.5	12.2	13.3	12.9	11.5	11.9	12.3	12.6	11.9	12.7	12.2	13.8	12.7
Hpsi	7.6	7.1	7.2	8.4	9.5	9.1	9.2	9.4	9.9	7.2	6.4	7.1	7.9	8.4	8.6	9.1	8.8	8.8
Hpsp	4.9	5.8	5.5	5.7	6.5	6.1	1.4	1.8	1.9	1.6	1.1	1.2	2.4	3.1	2.6	4.7	4.8	5.8
Mid-night	11.6	12.3	11.8	12.1	13.5	13.1	12.9	13.6	13.1	13	12.1	12.4	13.1	13.8	13.3	13.4	14.5	14.1
Moon-light	9.7	10.6	10.3	11.8	12.4	12.1	12.2	13.1	12.5	10.3	11.2	10.9	11.7	12.5	12.1	12	13.1	12.4
Blue-Chip	10.2	9.5	9.2	10.8	11.6	11.8	11.7	12.6	12.3	9.8	10.5	10.9	11.9	10.9	11.1	11.7	12.5	12.4
Figure 3a: H2O2 content (μmol g-1FW)
	Hpp			Hpsi			Hpsp			Midnight			Moonlight			BlueChip
May	9.5	9.3	9.7	10.4	10.2	11	11.4	10.8	12	9.2	8.8	9.6	9.4	9	9.8	9.6	9.8	10
Jun	9.8	9.4	10.2	13.7	13.2	14.2	16.7	16	17.4	9.5	9	10	9.8	9.2	10.4	10.3	10	10.6
Jul	14.6	14	15.2	17.4	17	17.8	0	0	0	13.8	13	14.6	15.1	14.8	15.4	15.8	15	16.6
Aug	17.4	17	17.8	21.3	21	21.6	0	0	0	16.1	15.8	16.4	18.8	18	19.6	18.5	18	19
Sept	12.5	12	13	13.1	12.7	13.5	12.9	12.2	13.6	11.6	11	12.2	12.8	12	13.6	13.2	12.5	13.9
Oct	10.7	10.5	10.9	12.8	12.4	13.2	11.4	11	11.8	9.5	9.8	10	11.3	11	11.6	10.8	10	11.6
Figure 3b: O2- content (μmol g-1FW)
	Hpp			Hpsi			Hpsp			Midnight			Moonlight			BlueChip
May	8.2	8	8.4	10.4	10	10.8	10.8	10	11.6	7.9	7	8.8	8.3	8	8.6	8.6	8	9.2
Jun	10.8	10	11.6	12.7	12.2	13.2	20.6	20	21.2	9.7	9	10.4	11.3	11	11.6	12.5	12	13
Jul	18.4	17.8	19	24.5	24	25	0	0	0	15.2	14	16.2	19.6	20.8	20.2	21.4	21	22.8
Aug	22.3	21.8	22.8	26.1	25.5	27.6	0	0	0	20.4	20	20.8	23.8	23	24.6	24.2	23	25.4
Sept	13.6	12.6	14.6	17.5	17	18	12.5	12	13	12.9	11.4	14.4	13.5	13	14	13.2	12.2	14.2
Oct	10.3	10	10.6	12.4	11	13.8	10	10.6	11.2	9.2	9.7	8.7	10.8	9.8	11.8	11.6	10	13.2
Figure 3c: Total Chl content(mg g-1FW)
	Hpp			Hpsi			Hpsp			Midnight			Moonlight			BlueChip
May	2.68	2.53	2.83	2.65	2.58	2.8	3.44	3.36	3.52	2.81	2.71	2.91	2.71	2.56	2.86	2.44	2.4	2.48
Jun	3.06	3	3.12	2.03	1.93	2.13	0.27	0.2	0.34	3.24	3.14	3.34	2.98	2.8	3.16	2.49	2.4	2.58
Jul	2.88	2.78	2.98	2.64	2.54	2.74	0	0	0	3.05	2.9	3.2	2.47	2.4	2.54	2.14	2.1	2.18
Aug	2.24	2.14	2.34	2.31	2.16	2.46	0	0	0	2.57	2.5	2.64	1.94	1.89	1.99	1.56	1.46	1.66
Sept	2.48	2.3	2.62	2.66	2.56	2.76	2.84	2.74	2.94	2.51	2.35	2.67	2.35	2.25	2.45	2.21	2.17	2.25
Oct	2.69	2.6	2.78	1.82	1.77	1.87	3.14	3	3.28	2.72	2.62	2.82	2.57	2.5	2.64	2.46	2.4	2.52
Figure 3d: MDA content (mmol g-1FW)
	Hpp			Hpsi			Hpsp			Midnight			Moonlight			BlueChip
May	2.1	1.9	2.3	1.4	1.35	1.45	1.6	1.52	1.68	2.3	2.15	2.45	1.9	1.8	2	1.8	1.75	1.85
Jun	2.6	2.4	2.8	2.1	2	2.2	3.8	3.65	3.95	2.5	2.3	2.7	2.8	2.7	2.9	3.1	2.95	3.25
Jul	3.3	3.15	3.35	2.8	2.75	2.85	0	0	0	2.9	2.8	3.1	3.6	3.4	3.8	3.8	3.7	3.9
Aug	4.2	4.1	4.3	3.7	3.6	3.8	0	0	0	3.8	3.65	3.95	4.4	4.15	4.45	4.8	4.5	5
Sept	3.6	3.5	3.7	3.1	3	3.2	2.8	2.7	2.9	3.4	3.2	3.6	3.7	3.65	3.75	4.1	4	4.2
Oct	2.9	2.7	3.1	2.6	2.5	2.7	2.2	2.1	2.3	2.6	2.45	2.75	3.2	3.1	3.3	3.5	3.4	3.6
Figure 4a: SOD activity (U g-1FW)
	Hpp			Hpsi			Hpsp			Midnight			Moonlight			BlueChip
May	112	108	116	126	110	142	82	78	86	126	116	136	98	92	104	94	90	98
Jun	136	136	142	148	140	156	118	115	121	167	147	187	128	123	133	123	113	133
Jul	247	232	262	230	234	238	0	0	0	286	266	306	249	239	259	238	230	246
Aug	388	373	403	314	300	328	0	0	0	421	406	436	383	378	388	369	360	378
Sept	186	176	196	157	150	164	104	96	112	193	178	208	188	180	196	173	165	181
Oct	134	124	144	142	134	150	96	90	102	141	125	156	133	123	143	125	120	130
Figure 4b: CAT activity(U g-1 min-1 FW)
	Hpp			Hpsi			Hpsp			Midnight			Moonlight			BlueChip
May	194	184	204	218	210	226	132	126	138	222	212	232	195	190	200	189	180	198
Jun	227	220	234	245	230	260	96	92	100	235	220	250	219	210	228	211	206	216
Jul	204	196	212	232	225	239	0	0	0	215	210	220	194	190	198	185	180	190
Aug	193	188	198	211	206	216	0	0	0	198	190	216	186	180	192	181	178	184
Sept	218	210	226	223	216	230	142	137	147	226	216	236	214	210	218	213	210	216
Oct	209	209	218	218	210	226	136	130	142	224	210	238	211	206	216	198	190	216
Figure 4c: POD activity(U g-1 min-1 FW)
	Hpp			Hpsi			Hpsp			Midnight			Moonlight			BlueChip
May	265	250	280	178	170	186	145	140	150	248	243	253	236	226	246	228	220	236
Jun	366	350	382	321	310	332	119	110	128	388	370	396	343	330	356	327	310	344
Jul	335	325	345	304	290	318	0	0	0	325	310	340	306	296	316	301	291	311
Aug	324	310	338	285	270	300	0	0	0	318	308	328	287	272	302	273	270	276
Sept	357	340	374	289	280	298	158	150	166	348	335	361	322	310	334	306	300	312
Oct	346	336	356	293	280	306	166	156	176	338	320	356	315	300	330	301	290	312
Figure 4d: GSH activity (mg g-1FW)
	Hpp			Hpsi			Hpsp			Midnight			Moonlight			BlueChip
May	0.42	0.4	0.44	0.38	0.33	0.43	0.52	0.5	0.54	0.46	0.4	0.52	0.43	0.4	0.46	0.41	0.38	0.44
Jun	0.82	0.8	0.84	0.47	0.4	0.54	0.41	0.36	0.46	0.89	0.8	0.98	0.81	0.75	0.87	0.74	0.7	0.78
Jul	1.48	1.4	1.56	1.26	1.23	1.29	0	0	0	1.56	1.5	1.62	1.43	1.4	1.46	1.38	1.3	1.46
Aug	1.24	1.2	1.28	1.21	1.24	1.18	0	0	0	1.35	1.25	1.45	1.22	1.2	1.24	1.19	1.1	1.28
Sept	0.91	0.87	0.95	0.77	0.7	0.84	0.58	0.5	0.66	0.96	0.9	1.02	0.87	0.8	0.94	0.81	0.78	0.84
Oct	0.75	0.7	0.8	0.65	0.6	0.7	0.55	0.5	0.6	0.81	0.75	0.87	0.76	0.7	0.82	0.73	0.7	0.76
Figure 5a: TSP content(mg g-1FW)
	Hpp			Hpsi			Hpsp			Midnight			Moonlight			BlueChip
May	12.23	11.75	12.73	11.99	11	12	12.17	11.17	13.17	11.93	11	12.86	11.06	10.76	11.36	9.21	9	9.42
Jun	22.11	21.51	22.61	15	15.45	15.9	5.98	5.48	6.48	24.24	23.24	25.24	23.19	22.69	23.65	22.54	22	23.08
Jul	20.03	19	21.06	18.5	18.94	19.44	0	0	0	21.15	20.65	21.65	19.8	19	20.6	16.76	16	17.42
Aug	19.84	19	20.18	16.8	16	17.6	0	0	0	19.25	18.75	19.75	13.94	13	14.88	12.51	12	13.02
Sept	19.7	19	20.4	20.7	21.7	20.5	17.6	16.6	18.6	18.82	18	19.64	16.84	16.34	17.34	16.5	17	16
Oct	18.64	17.64	19.64	17.24	16.74	17.74	17.29	17	17.58	17.75	17	18.5	14.34	14	14.68	14.21	14	14.42
Figure 5b: TSS comtent (mg g-1FW)
	Hpp			Hpsi			Hpsp			Midnight			Moonlight			BlueChip
May	8.22	7.5	8.94	5.34	5.14	5.54	7.38	7	7.76	8.08	7.5	8.58	8.24	7.24	9.24	8.37	7.87	8.87
Jun	10.41	10	10.82	8.38	8	8.76	11.34	10.34	12.34	11.32	11	11.64	9.85	9.35	10.35	9.61	9.31	9.91
Jul	21.64	20.64	22.64	13.86	13	14.72	0	0	0	22.45	21.45	23.45	20.36	20	20.72	19.28	19	19.56
Aug	23.52	22	25.04	14.78	14	15.56	0	0	0	25.64	25	26.28	22.31	22	22.62	22.04	21.54	22.54
Sept	15.37	14.5	16.14	11.62	11	12.24	10.15	9.65	10.65	13.28	12	14.56	11.67	11	12.34	10.88	10	11.76
Oct	18.65	18	19.23	14.37	14	14.74	16.34	15.34	16.34	19.23	18	20.46	18.11	17.11	19.11	17.68	16.68	18.68
Figure 5c: Proline content(μg g-1FW)
	Hpp			Hpsi			Hpsp			Midnight			Moonlight			BlueChip
May	52.4	50	54.8	62.8	52	72	48.7	40	56	53.6	48	58	53.9	53	56	53.2	43	63
Jun	89.6	79	99	88.4	80.8	96	90.3	75	105	92.5	87.5	97.5	87.4	77	104	86.5	80	92
Jul	231.6	221.6	241.6	124.4	124	128	0	0	0	256.4	246	266	222.5	217	227	219	213	225
Aug	248.7	240	256	135.8	135	140	0	0	0	263.4	255	271	236.7	230	242	231.5	225	237
Sept	196.2	190.2	212.2	115.4	100.4	130.4	68.3	63	73	187.4	177	197	185.9	180	190	182.8	172	192
Oct	181.6	171	191	109.7	100	118	66.2	60	72	183.6	175	191	175.9	170	180	171.4	168	174
Figure 5d: ASA content (mg g-1FW)
	Hpp			Hpsi			Hpsp			Midnight			Moonlight			BlueChip
May	0.94	0.84	1.04	0.88	0.84	0.92	0.68	0.6	0.76	1.02	0.8	1.24	0.93	0.9	0.96	0.94	0.84	1.04
Jun	1.23	1.18	1.28	0.97	0.9	1.04	0.89	0.8	0.98	1.35	1.2	1.5	1.21	1.11	1.31	1.18	1.08	1.28
Jul	2.56	2.5	2.62	1.45	1.38	1.53	0	0	0	2.87	2.7	2.97	2.48	2.4	2.56	2.43	2.35	2.48
Aug	3.06	3	3.12	1.88	1.8	1.96	0	0	0	3.29	3.19	3.39	2.88	2.75	3.01	2.76	2.66	2.86
Sept	2.21	2.16	2.26	1.23	1.1	1.36	0.78	0.7	0.86	2.46	2.3	2.62	2.23	2.13	2.33	2.18	2.08	2.28
Oct	1.46	1.4	1.52	1.02	0.97	1.12	0.71	0.65	0.77	1.49	1.4	1.58	1.38	1.28	1.48	1.32	1.27	1.37

## Sheet: Sheet2
Figure 3a: H2O2 content (μmol g-1FW)
	Hpp			Hpsi			Hpsp			Midnight			Moonlight			BlueChip
May	9.5	9.3	9.7	10.4	10.2	11	11.4	10.8	12	9.2	8.8	9.6	9.4	9	9.8	9.6	9.8	10
Jun	9.8	9.4	10.2	13.7	13.2	14.2	16.7	16	17.4	9.5	9	10	9.8	9.2	10.4	10.3	10	10.6
Jul	14.6	14	15.2	17.4	17	17.8	0	0	0	13.8	13	14.6	15.1	14.8	15.4	15.8	15	16.6
Aug	17.4	17	17.8	21.3	21	21.6	0	0	0	16.1	15.8	16.4	18.8	18	19.6	18.5	18	19
Sept	12.5	12	13	13.1	12.7	13.5	12.9	12.2	13.6	11.6	11	12.2	12.8	12	13.6	13.2	12.5	13.9
Oct	10.7	10.5	10.9	12.8	12.4	13.2	11.4	11	11.8	9.5	9.8	10	11.3	11	11.6	10.8	10	11.6
Figure 3b: O2- content (μmol g-1FW)
	Hpp			Hpsi			Hpsp			Midnight			Moonlight			BlueChip
May	8.2	8	8.4	10.4	10	10.8	10.8	10	11.6	7.9	7	8.8	8.3	8	8.6	8.6	8	9.2
Jun	10.8	10	11.6	12.7	12.2	13.2	20.6	20	21.2	9.7	9	10.4	11.3	11	11.6	12.5	12	13
Jul	18.4	17.8	19	24.5	24	25	0	0	0	15.2	14	16.2	19.6	20.8	20.2	21.4	21	22.8
Aug	22.3	21.8	22.8	26.1	25.5	27.6	0	0	0	20.4	20	20.8	23.8	23	24.6	24.2	23	25.4
Sept	13.6	12.6	14.6	17.5	17	18	12.5	12	13	12.9	11.4	14.4	13.5	13	14	13.2	12.2	14.2
Oct	10.3	10	10.6	12.4	11	13.8	10	10.6	11.2	9.2	9.7	8.7	10.8	9.8	11.8	11.6	10	13.2
Figure 3c: Total Chl content(mg g-1FW)
	Hpp			Hpsi			Hpsp			Midnight			Moonlight			BlueChip
May	2.68	2.53	2.83	2.65	2.58	2.8	3.44	3.36	3.52	2.81	2.71	2.91	2.71	2.56	2.86	2.44	2.4	2.48
Jun	3.06	3	3.12	2.03	1.93	2.13	0.27	0.2	0.34	3.24	3.14	3.34	2.98	2.8	3.16	2.49	2.4	2.58
Jul	2.88	2.78	2.98	2.64	2.54	2.74	0	0	0	3.05	2.9	3.2	2.47	2.4	2.54	2.14	2.1	2.18
Aug	2.24	2.14	2.34	2.31	2.16	2.46	0	0	0	2.57	2.5	2.64	1.94	1.89	1.99	1.56	1.46	1.66
Sept	2.48	2.3	2.62	2.66	2.56	2.76	2.84	2.74	2.94	2.51	2.35	2.67	2.35	2.25	2.45	2.21	2.17	2.25
Oct	2.69	2.6	2.78	1.82	1.77	1.87	3.14	3	3.28	2.72	2.62	2.82	2.57	2.5	2.64	2.46	2.4	2.52
Figure 3d: MDA content (mmol g-1FW)
	Hpp			Hpsi			Hpsp			Midnight			Moonlight			BlueChip
May	2.1	1.9	2.3	1.4	1.35	1.45	1.6	1.52	1.68	2.3	2.15	2.45	1.9	1.8	2	1.8	1.75	1.85
Jun	2.6	2.4	2.8	2.1	2	2.2	3.8	3.65	3.95	2.5	2.3	2.7	2.8	2.7	2.9	3.1	2.95	3.25
Jul	3.3	3.15	3.35	2.8	2.75	2.85	0	0	0	2.9	2.8	3.1	3.6	3.4	3.8	3.8	3.7	3.9
Aug	4.2	4.1	4.3	3.7	3.6	3.8	0	0	0	3.8	3.65	3.95	4.4	4.15	4.45	4.8	4.5	5
Sept	3.6	3.5	3.7	3.1	3	3.2	2.8	2.7	2.9	3.4	3.2	3.6	3.7	3.65	3.75	4.1	4	4.2
Oct	2.9	2.7	3.1	2.6	2.5	2.7	2.2	2.1	2.3	2.6	2.45	2.75	3.2	3.1	3.3	3.5	3.4	3.6
Figure 4a: SOD activity (U g-1FW)
	Hpp			Hpsi			Hpsp			Midnight			Moonlight			BlueChip
May	112	108	116	126	110	142	82	78	86	126	116	136	98	92	104	94	90	98
Jun	136	136	142	148	140	156	118	115	121	167	147	187	128	123	133	123	113	133
Jul	247	232	262	230	234	238	0	0	0	286	266	306	249	239	259	238	230	246
Aug	388	373	403	314	300	328	0	0	0	421	406	436	383	378	388	369	360	378
Sept	186	176	196	157	150	164	104	96	112	193	178	208	188	180	196	173	165	181
Oct	134	124	144	142	134	150	96	90	102	141	125	156	133	123	143	125	120	130
Figure 4b: CAT activity(U g-1 min-1 FW)
	Hpp			Hpsi			Hpsp			Midnight			Moonlight			BlueChip
May	194	184	204	218	210	226	132	126	138	222	212	232	195	190	200	189	180	198
Jun	227	220	234	245	230	260	96	92	100	235	220	250	219	210	228	211	206	216
Jul	204	196	212	232	225	239	0	0	0	215	210	220	194	190	198	185	180	190
Aug	193	188	198	211	206	216	0	0	0	198	190	216	186	180	192	181	178	184
Sept	218	210	226	223	216	230	142	137	147	226	216	236	214	210	218	213	210	216
Oct	209	209	218	218	210	226	136	130	142	224	210	238	211	206	216	198	190	216
Figure 4c: POD activity(U g-1 min-1 FW)
	Hpp			Hpsi			Hpsp			Midnight			Moonlight			BlueChip
May	265	250	280	178	170	186	145	140	150	248	243	253	236	226	246	228	220	236
Jun	366	350	382	321	310	332	119	110	128	388	370	396	343	330	356	327	310	344
Jul	335	325	345	304	290	318	0	0	0	325	310	340	306	296	316	301	291	311
Aug	324	310	338	285	270	300	0	0	0	318	308	328	287	272	302	273	270	276
Sept	357	340	374	289	280	298	158	150	166	348	335	361	322	310	334	306	300	312
Oct	346	336	356	293	280	306	166	156	176	338	320	356	315	300	330	301	290	312
Figure 4d: GSH activity (mg g-1FW)
	Hpp			Hpsi			Hpsp			Midnight			Moonlight			BlueChip
May	0.42	0.4	0.44	0.38	0.33	0.43	0.52	0.5	0.54	0.46	0.4	0.52	0.43	0.4	0.46	0.41	0.38	0.44
Jun	0.82	0.8	0.84	0.47	0.4	0.54	0.41	0.36	0.46	0.89	0.8	0.98	0.81	0.75	0.87	0.74	0.7	0.78
Jul	1.48	1.4	1.56	1.26	1.23	1.29	0	0	0	1.56	1.5	1.62	1.43	1.4	1.46	1.38	1.3	1.46
Aug	1.24	1.2	1.28	1.21	1.24	1.18	0	0	0	1.35	1.25	1.45	1.22	1.2	1.24	1.19	1.1	1.28
Sept	0.91	0.87	0.95	0.77	0.7	0.84	0.58	0.5	0.66	0.96	0.9	1.02	0.87	0.8	0.94	0.81	0.78	0.84
Oct	0.75	0.7	0.8	0.65	0.6	0.7	0.55	0.5	0.6	0.81	0.75	0.87	0.76	0.7	0.82	0.73	0.7	0.76
Figure 5a: TSP content(mg g-1FW)
	Hpp			Hpsi			Hpsp			Midnight			Moonlight			BlueChip
May	12.23	11.75	12.73	11.99	11	12	12.17	11.17	13.17	11.93	11	12.86	11.06	10.76	11.36	9.21	9	9.42
Jun	22.11	21.51	22.61	15	15.45	15.9	5.98	5.48	6.48	24.24	23.24	25.24	23.19	22.69	23.65	22.54	22	23.08
Jul	20.03	19	21.06	18.5	18.94	19.44	0	0	0	21.15	20.65	21.65	19.8	19	20.6	16.76	16	17.42
Aug	19.84	19	20.18	16.8	16	17.6	0	0	0	19.25	18.75	19.75	13.94	13	14.88	12.51	12	13.02
Sept	19.7	19	20.4	20.7	21.7	20.5	17.6	16.6	18.6	18.82	18	19.64	16.84	16.34	17.34	16.5	17	16
Oct	18.64	17.64	19.64	17.24	16.74	17.74	17.29	17	17.58	17.75	17	18.5	14.34	14	14.68	14.21	14	14.42
Figure 5b: TSS comtent (mg g-1FW)
	Hpp			Hpsi			Hpsp			Midnight			Moonlight			BlueChip
May	8.22	7.5	8.94	5.34	5.14	5.54	7.38	7	7.76	8.08	7.5	8.58	8.24	7.24	9.24	8.37	7.87	8.87
Jun	10.41	10	10.82	8.38	8	8.76	11.34	10.34	12.34	11.32	11	11.64	9.85	9.35	10.35	9.61	9.31	9.91
Jul	21.64	20.64	22.64	13.86	13	14.72	0	0	0	22.45	21.45	23.45	20.36	20	20.72	19.28	19	19.56
Aug	23.52	22	25.04	14.78	14	15.56	0	0	0	25.64	25	26.28	22.31	22	22.62	22.04	21.54	22.54
Sept	15.37	14.5	16.14	11.62	11	12.24	10.15	9.65	10.65	13.28	12	14.56	11.67	11	12.34	10.88	10	11.76
Oct	18.65	18	19.23	14.37	14	14.74	16.34	15.34	16.34	19.23	18	20.46	18.11	17.11	19.11	17.68	16.68	18.68
Figure 5c: Proline content(μg g-1FW)
	Hpp			Hpsi			Hpsp			Midnight			Moonlight			BlueChip
May	52.4	50	54.8	62.8	52	72	48.7	40	56	53.6	48	58	53.9	53	56	53.2	43	63
Jun	89.6	79	99	88.4	80.8	96	90.3	75	105	92.5	87.5	97.5	87.4	77	104	86.5	80	92
Jul	231.6	221.6	241.6	124.4	124	128	0	0	0	256.4	246	266	222.5	217	227	219	213	225
Aug	248.7	240	256	135.8	135	140	0	0	0	263.4	255	271	236.7	230	242	231.5	225	237
Sept	196.2	190.2	212.2	115.4	100.4	130.4	68.3	63	73	187.4	177	197	185.9	180	190	182.8	172	192
Oct	181.6	171	191	109.7	100	118	66.2	60	72	183.6	175	191	175.9	170	180	171.4	168	174
Figure 5d: ASA content (mg g-1FW)
	Hpp			Hpsi			Hpsp			Midnight			Moonlight			BlueChip
May	0.94	0.84	1.04	0.88	0.84	0.92	0.68	0.6	0.76	1.02	0.8	1.24	0.93	0.9	0.96	0.94	0.84	1.04
Jun	1.23	1.18	1.28	0.97	0.9	1.04	0.89	0.8	0.98	1.35	1.2	1.5	1.21	1.11	1.31	1.18	1.08	1.28
Jul	2.56	2.5	2.62	1.45	1.38	1.53	0	0	0	2.87	2.7	2.97	2.48	2.4	2.56	2.43	2.35	2.48
Aug	3.06	3	3.12	1.88	1.8	1.96	0	0	0	3.29	3.19	3.39	2.88	2.75	3.01	2.76	2.66	2.86
Sept	2.21	2.16	2.26	1.23	1.1	1.36	0.78	0.7	0.86	2.46	2.3	2.62	2.23	2.13	2.33	2.18	2.08	2.28
Oct	1.46	1.4	1.52	1.02	0.97	1.12	0.71	0.65	0.77	1.49	1.4	1.58	1.38	1.28	1.48	1.32	1.27	1.37
